# Supplementary material
Source: publisher figshare collection journal article supplement (https://frontiersin.figshare.com/ndownloader/files/32418959)
Supplement: Supplementary file 1 [file 32418959]

time	depth
2018/07/20 12:50:00	4
2018/07/20 12:51:15	4
2018/07/20 12:52:30	11
2018/07/20 12:53:45	11
2018/07/20 12:55:00	4
2018/07/20 12:56:15	4
2018/07/20 12:57:30	4
2018/07/20 12:58:45	4
2018/07/20 13:00:00	102.5
2018/07/20 13:01:15	234.5
2018/07/20 13:02:30	410.5
2018/07/20 13:03:45	410.5
2018/07/20 13:05:00	410.5
2018/07/20 13:06:15	410.5
2018/07/20 13:07:30	352
2018/07/20 13:08:45	234.5
2018/07/20 13:10:00	80.5
2018/07/20 13:11:15	3.5
2018/07/20 13:12:30	3.5
2018/07/20 13:13:45	3.5
2018/07/20 13:15:00	3.5
2018/07/20 13:16:15	18.5
2018/07/20 13:17:30	190.5
2018/07/20 13:18:45	352
2018/07/20 13:20:00	410.5
2018/07/20 13:21:15	410.5
2018/07/20 13:22:30	410.5
2018/07/20 13:23:45	410.5
2018/07/20 13:25:00	293.5
2018/07/20 13:26:15	161.5
2018/07/20 13:27:30	36.5
2018/07/20 13:28:45	3.5
2018/07/20 13:30:00	3.5
2018/07/20 13:31:15	3.5
2018/07/20 13:32:30	3.5
2018/07/20 13:33:45	3.5
2018/07/20 13:35:00	3.5
2018/07/20 13:36:15	3.5
2018/07/20 13:37:30	132
2018/07/20 13:38:45	293.5
2018/07/20 13:40:00	410.5
2018/07/20 13:41:15	410.5
2018/07/20 13:42:30	410.5
2018/07/20 13:43:45	410.5
2018/07/20 13:45:00	352
2018/07/20 13:46:15	190.5
2018/07/20 13:47:30	66
2018/07/20 13:48:45	3.5
2018/07/20 13:50:00	3.5
2018/07/20 13:51:15	3.5
2018/07/20 13:52:30	3.5
2018/07/20 13:53:45	36.5
2018/07/20 13:55:00	190.5
2018/07/20 13:56:15	352
2018/07/20 13:57:30	410.5
2018/07/20 13:58:45	410.5
2018/07/20 14:00:00	410.5
2018/07/20 14:01:15	293.5
2018/07/20 14:02:30	161.5
2018/07/20 14:03:45	51.5
2018/07/20 14:05:00	3.5
2018/07/20 14:06:15	3.5
2018/07/20 14:07:30	3.5
2018/07/20 14:08:45	3.5
2018/07/20 14:10:00	18.5
2018/07/20 14:11:15	3.5
2018/07/20 14:12:30	3.5
2018/07/20 14:13:45	11
2018/07/20 14:15:00	18.5
2018/07/20 14:16:15	11
2018/07/20 14:17:30	18.5
2018/07/20 14:18:45	18.5
2018/07/20 14:20:00	18.5
2018/07/20 14:21:15	11
2018/07/20 14:22:30	3.5
2018/07/20 14:23:45	3.5
2018/07/20 14:25:00	11
2018/07/20 14:26:15	3.5
2018/07/20 14:27:30	3.5
2018/07/20 14:28:45	3.5
2018/07/20 14:30:00	36.5
2018/07/20 14:31:15	190.5
2018/07/20 14:32:30	352
2018/07/20 14:33:45	410.5
2018/07/20 14:35:00	410.5
2018/07/20 14:36:15	410.5
2018/07/20 14:37:30	293.5
2018/07/20 14:38:45	132
2018/07/20 14:40:00	25.5
2018/07/20 14:41:15	3.5
2018/07/20 14:42:30	3.5
2018/07/20 14:43:45	3.5
2018/07/20 14:45:00	3.5
2018/07/20 14:46:15	11
2018/07/20 14:47:30	36.5
2018/07/20 14:48:45	25.5
2018/07/20 14:50:00	25.5
2018/07/20 14:51:15	18.5
2018/07/20 14:52:30	18.5
2018/07/20 14:53:45	3.5
2018/07/20 14:55:00	3.5
2018/07/20 14:56:15	3.5
2018/07/20 14:57:30	3.5
2018/07/20 14:58:45	3.5
2018/07/20 15:00:00	78
2018/07/20 15:01:15	226.5
2018/07/20 15:02:30	340
2018/07/20 15:03:45	396.5
2018/07/20 15:05:00	396.5
2018/07/20 15:06:15	396.5
2018/07/20 15:07:30	340
2018/07/20 15:08:45	226.5
2018/07/20 15:10:00	99
2018/07/20 15:11:15	3.5
2018/07/20 15:12:30	3.5
2018/07/20 15:13:45	3.5
2018/07/20 15:15:00	3.5
2018/07/20 15:16:15	3.5
2018/07/20 15:17:30	3.5
2018/07/20 15:18:45	3.5
2018/07/20 15:20:00	3.5
2018/07/20 15:21:15	3.5
2018/07/20 15:22:30	3.5
2018/07/20 15:23:45	3.5
2018/07/20 15:25:00	35.5
2018/07/20 15:26:15	184
2018/07/20 15:27:30	340
2018/07/20 15:28:45	396.5
2018/07/20 15:30:00	396.5
2018/07/20 15:31:15	396.5
2018/07/20 15:32:30	396.5
2018/07/20 15:33:45	396.5
2018/07/20 15:35:00	226.5
2018/07/20 15:36:15	127.5
2018/07/20 15:37:30	25
2018/07/20 15:38:45	3.5
2018/07/20 15:40:00	3.5
2018/07/20 15:41:15	10.5
2018/07/20 15:42:30	35.5
2018/07/20 15:43:45	10.5
2018/07/20 15:45:00	3.5
2018/07/20 15:46:15	17.5
2018/07/20 15:47:30	25
2018/07/20 15:48:45	3.5
2018/07/20 15:50:00	3.5
2018/07/20 15:51:15	3.5
2018/07/20 15:52:30	3.5
2018/07/20 15:53:45	3.5
2018/07/20 15:55:00	3.5
2018/07/20 15:56:15	3.5
2018/07/20 15:57:30	3.5
2018/07/20 15:58:45	10.5
2018/07/20 16:00:00	NA
2018/07/20 16:01:15	NA
2018/07/20 16:02:30	NA
2018/07/20 16:03:45	NA
2018/07/20 16:05:00	NA
2018/07/20 16:06:15	NA
2018/07/20 16:07:30	NA
2018/07/20 16:08:45	NA
2018/07/20 16:10:00	NA
2018/07/20 16:11:15	NA
2018/07/20 16:12:30	NA
2018/07/20 16:13:45	NA
2018/07/20 16:15:00	NA
2018/07/20 16:16:15	NA
2018/07/20 16:17:30	NA
2018/07/20 16:18:45	NA
2018/07/20 16:20:00	NA
2018/07/20 16:21:15	NA
2018/07/20 16:22:30	NA
2018/07/20 16:23:45	NA
2018/07/20 16:25:00	NA
2018/07/20 16:26:15	NA
2018/07/20 16:27:30	NA
2018/07/20 16:28:45	NA
2018/07/20 16:30:00	NA
2018/07/20 16:31:15	NA
2018/07/20 16:32:30	NA
2018/07/20 16:33:45	NA
2018/07/20 16:35:00	NA
2018/07/20 16:36:15	NA
2018/07/20 16:37:30	NA
2018/07/20 16:38:45	NA
2018/07/20 16:40:00	NA
2018/07/20 16:41:15	NA
2018/07/20 16:42:30	NA
2018/07/20 16:43:45	NA
2018/07/20 16:45:00	NA
2018/07/20 16:46:15	NA
2018/07/20 16:47:30	NA
2018/07/20 16:48:45	NA
2018/07/20 16:50:00	NA
2018/07/20 16:51:15	NA
2018/07/20 16:52:30	NA
2018/07/20 16:53:45	NA
2018/07/20 16:55:00	NA
2018/07/20 16:56:15	NA
2018/07/20 16:57:30	NA
2018/07/20 16:58:45	NA
2018/07/20 17:00:00	11
2018/07/20 17:01:15	4
2018/07/20 17:02:30	11
2018/07/20 17:03:45	11
2018/07/20 17:05:00	4
2018/07/20 17:06:15	104.5
2018/07/20 17:07:30	239.5
2018/07/20 17:08:45	359
2018/07/20 17:10:00	419
2018/07/20 17:11:15	419
2018/07/20 17:12:30	419
2018/07/20 17:13:45	419
2018/07/20 17:15:00	359
2018/07/20 17:16:15	194.5
2018/07/20 17:17:30	67.5
2018/07/20 17:18:45	4
2018/07/20 17:20:00	4
2018/07/20 17:21:15	4
2018/07/20 17:22:30	11
2018/07/20 17:23:45	11
2018/07/20 17:25:00	18.5
2018/07/20 17:26:15	11
2018/07/20 17:27:30	11
2018/07/20 17:28:45	11
2018/07/20 17:30:00	4
2018/07/20 17:31:15	4
2018/07/20 17:32:30	4
2018/07/20 17:33:45	4
2018/07/20 17:35:00	4
2018/07/20 17:36:15	4
2018/07/20 17:37:30	4
2018/07/20 17:38:45	11
2018/07/20 17:40:00	11
2018/07/20 17:41:15	11
2018/07/20 17:42:30	4
2018/07/20 17:43:45	4
2018/07/20 17:45:00	4
2018/07/20 17:46:15	104.5
2018/07/20 17:47:30	194.5
2018/07/20 17:48:45	359
2018/07/20 17:50:00	419
2018/07/20 17:51:15	419
2018/07/20 17:52:30	419
2018/07/20 17:53:45	419
2018/07/20 17:55:00	239.5
2018/07/20 17:56:15	134.5
2018/07/20 17:57:30	4
2018/07/20 17:58:45	4
2018/07/20 18:00:00	4
2018/07/20 18:01:15	4
2018/07/20 18:02:30	4
2018/07/20 18:03:45	4
2018/07/20 18:05:00	4
2018/07/20 18:06:15	4
2018/07/20 18:07:30	4
2018/07/20 18:08:45	11
2018/07/20 18:10:00	4
2018/07/20 18:11:15	4
2018/07/20 18:12:30	4
2018/07/20 18:13:45	104.5
2018/07/20 18:15:00	239.5
2018/07/20 18:16:15	419
2018/07/20 18:17:30	419
2018/07/20 18:18:45	419
2018/07/20 18:20:00	419
2018/07/20 18:21:15	299
2018/07/20 18:22:30	134.5
2018/07/20 18:23:45	11
2018/07/20 18:25:00	4
2018/07/20 18:26:15	4
2018/07/20 18:27:30	4
2018/07/20 18:28:45	4
2018/07/20 18:30:00	4
2018/07/20 18:31:15	4
2018/07/20 18:32:30	4
2018/07/20 18:33:45	4
2018/07/20 18:35:00	11
2018/07/20 18:36:15	11
2018/07/20 18:37:30	4
2018/07/20 18:38:45	4
2018/07/20 18:40:00	4
2018/07/20 18:41:15	4
2018/07/20 18:42:30	52
2018/07/20 18:43:45	164.5
2018/07/20 18:45:00	299
2018/07/20 18:46:15	419
2018/07/20 18:47:30	419
2018/07/20 18:48:45	419
2018/07/20 18:50:00	359
2018/07/20 18:51:15	239.5
2018/07/20 18:52:30	82.5
2018/07/20 18:53:45	4
2018/07/20 18:55:00	4
2018/07/20 18:56:15	4
2018/07/20 18:57:30	4
2018/07/20 18:58:45	4
2018/07/20 19:00:00	11.5
2018/07/20 19:01:15	4
2018/07/20 19:02:30	4
2018/07/20 19:03:45	4
2018/07/20 19:05:00	4
2018/07/20 19:06:15	4
2018/07/20 19:07:30	4
2018/07/20 19:08:45	4
2018/07/20 19:10:00	19
2018/07/20 19:11:15	167.5
2018/07/20 19:12:30	304
2018/07/20 19:13:45	426.5
2018/07/20 19:15:00	426.5
2018/07/20 19:16:15	426.5
2018/07/20 19:17:30	426.5
2018/07/20 19:18:45	304
2018/07/20 19:20:00	167.5
2018/07/20 19:21:15	26.5
2018/07/20 19:22:30	4
2018/07/20 19:23:45	4
2018/07/20 19:25:00	4
2018/07/20 19:26:15	4
2018/07/20 19:27:30	4
2018/07/20 19:28:45	19
2018/07/20 19:30:00	4
2018/07/20 19:31:15	4
2018/07/20 19:32:30	19
2018/07/20 19:33:45	19
2018/07/20 19:35:00	4
2018/07/20 19:36:15	4
2018/07/20 19:37:30	4
2018/07/20 19:38:45	4
2018/07/20 19:40:00	4
2018/07/20 19:41:15	4
2018/07/20 19:42:30	4
2018/07/20 19:43:45	4
2018/07/20 19:45:00	68.5
2018/07/20 19:46:15	197.5
2018/07/20 19:47:30	365
2018/07/20 19:48:45	426.5
2018/07/20 19:50:00	426.5
2018/07/20 19:51:15	426.5
2018/07/20 19:52:30	304
2018/07/20 19:53:45	167.5
2018/07/20 19:55:00	38
2018/07/20 19:56:15	4
2018/07/20 19:57:30	4
2018/07/20 19:58:45	4
2018/07/20 20:00:00	4
2018/07/20 20:01:15	4
2018/07/20 20:02:30	4
2018/07/20 20:03:45	4
2018/07/20 20:05:00	4
2018/07/20 20:06:15	4
2018/07/20 20:07:30	4
2018/07/20 20:08:45	4
2018/07/20 20:10:00	4
2018/07/20 20:11:15	4
2018/07/20 20:12:30	4
2018/07/20 20:13:45	11
2018/07/20 20:15:00	4
2018/07/20 20:16:15	4
2018/07/20 20:17:30	4
2018/07/20 20:18:45	4
2018/07/20 20:20:00	18.5
2018/07/20 20:21:15	18.5
2018/07/20 20:22:30	4
2018/07/20 20:23:45	4
2018/07/20 20:25:00	4
2018/07/20 20:26:15	26
2018/07/20 20:27:30	26
2018/07/20 20:28:45	4
2018/07/20 20:30:00	4
2018/07/20 20:31:15	11
2018/07/20 20:32:30	4
2018/07/20 20:33:45	11
2018/07/20 20:35:00	4
2018/07/20 20:36:15	4
2018/07/20 20:37:30	82.5
2018/07/20 20:38:45	194.5
2018/07/20 20:40:00	359
2018/07/20 20:41:15	419
2018/07/20 20:42:30	419
2018/07/20 20:43:45	419
2018/07/20 20:45:00	419
2018/07/20 20:46:15	299
2018/07/20 20:47:30	194.5
2018/07/20 20:48:45	52
2018/07/20 20:50:00	4
2018/07/20 20:51:15	4
2018/07/20 20:52:30	4
2018/07/20 20:53:45	4
2018/07/20 20:55:00	4
2018/07/20 20:56:15	4
2018/07/20 20:57:30	11
2018/07/20 20:58:45	4
2018/07/20 21:00:00	4
2018/07/20 21:01:15	11.5
2018/07/20 21:02:30	19
2018/07/20 21:03:45	4
2018/07/20 21:05:00	4
2018/07/20 21:06:15	11.5
2018/07/20 21:07:30	11.5
2018/07/20 21:08:45	4
2018/07/20 21:10:00	4
2018/07/20 21:11:15	4
2018/07/20 21:12:30	4
2018/07/20 21:13:45	53
2018/07/20 21:15:00	167.5
2018/07/20 21:16:15	304
2018/07/20 21:17:30	426.5
2018/07/20 21:18:45	426.5
2018/07/20 21:20:00	426.5
2018/07/20 21:21:15	426.5
2018/07/20 21:22:30	243
2018/07/20 21:23:45	137
2018/07/20 21:25:00	11.5
2018/07/20 21:26:15	4
2018/07/20 21:27:30	4
2018/07/20 21:28:45	4
2018/07/20 21:30:00	19
2018/07/20 21:31:15	4
2018/07/20 21:32:30	4
2018/07/20 21:33:45	4
2018/07/20 21:35:00	4
2018/07/20 21:36:15	4
2018/07/20 21:37:30	4
2018/07/20 21:38:45	4
2018/07/20 21:40:00	4
2018/07/20 21:41:15	11.5
2018/07/20 21:42:30	4
2018/07/20 21:43:45	4
2018/07/20 21:45:00	4
2018/07/20 21:46:15	4
2018/07/20 21:47:30	83.5
2018/07/20 21:48:45	197.5
2018/07/20 21:50:00	365
2018/07/20 21:51:15	426.5
2018/07/20 21:52:30	426.5
2018/07/20 21:53:45	426.5
2018/07/20 21:55:00	365
2018/07/20 21:56:15	243
2018/07/20 21:57:30	137
2018/07/20 21:58:45	11.5
2018/07/20 22:00:00	4
2018/07/20 22:01:15	4
2018/07/20 22:02:30	4
2018/07/20 22:03:45	4
2018/07/20 22:05:00	4
2018/07/20 22:06:15	4
2018/07/20 22:07:30	11
2018/07/20 22:08:45	11
2018/07/20 22:10:00	4
2018/07/20 22:11:15	4
2018/07/20 22:12:30	4
2018/07/20 22:13:45	11
2018/07/20 22:15:00	18.5
2018/07/20 22:16:15	11
2018/07/20 22:17:30	4
2018/07/20 22:18:45	4
2018/07/20 22:20:00	4
2018/07/20 22:21:15	18.5
2018/07/20 22:22:30	26
2018/07/20 22:23:45	18.5
2018/07/20 22:25:00	4
2018/07/20 22:26:15	4
2018/07/20 22:27:30	4
2018/07/20 22:28:45	4
2018/07/20 22:30:00	4
2018/07/20 22:31:15	18.5
2018/07/20 22:32:30	11
2018/07/20 22:33:45	4
2018/07/20 22:35:00	4
2018/07/20 22:36:15	4
2018/07/20 22:37:30	11
2018/07/20 22:38:45	11
2018/07/20 22:40:00	4
2018/07/20 22:41:15	4
2018/07/20 22:42:30	4
2018/07/20 22:43:45	4
2018/07/20 22:45:00	67.5
2018/07/20 22:46:15	194.5
2018/07/20 22:47:30	299
2018/07/20 22:48:45	419
2018/07/20 22:50:00	419
2018/07/20 22:51:15	419
2018/07/20 22:52:30	419
2018/07/20 22:53:45	359
2018/07/20 22:55:00	239.5
2018/07/20 22:56:15	104.5
2018/07/20 22:57:30	4
2018/07/20 22:58:45	4
2018/07/20 23:00:00	NA
2018/07/20 23:01:15	NA
2018/07/20 23:02:30	NA
2018/07/20 23:03:45	NA
2018/07/20 23:05:00	NA
2018/07/20 23:06:15	NA
2018/07/20 23:07:30	NA
2018/07/20 23:08:45	NA
2018/07/20 23:10:00	NA
2018/07/20 23:11:15	NA
2018/07/20 23:12:30	NA
2018/07/20 23:13:45	NA
2018/07/20 23:15:00	NA
2018/07/20 23:16:15	NA
2018/07/20 23:17:30	NA
2018/07/20 23:18:45	NA
2018/07/20 23:20:00	NA
2018/07/20 23:21:15	NA
2018/07/20 23:22:30	NA
2018/07/20 23:23:45	NA
2018/07/20 23:25:00	NA
2018/07/20 23:26:15	NA
2018/07/20 23:27:30	NA
2018/07/20 23:28:45	NA
2018/07/20 23:30:00	NA
2018/07/20 23:31:15	NA
2018/07/20 23:32:30	NA
2018/07/20 23:33:45	NA
2018/07/20 23:35:00	NA
2018/07/20 23:36:15	NA
2018/07/20 23:37:30	NA
2018/07/20 23:38:45	NA
2018/07/20 23:40:00	NA
2018/07/20 23:41:15	NA
2018/07/20 23:42:30	NA
2018/07/20 23:43:45	NA
2018/07/20 23:45:00	NA
2018/07/20 23:46:15	NA
2018/07/20 23:47:30	NA
2018/07/20 23:48:45	NA
2018/07/20 23:50:00	NA
2018/07/20 23:51:15	NA
2018/07/20 23:52:30	NA
2018/07/20 23:53:45	NA
2018/07/20 23:55:00	NA
2018/07/20 23:56:15	NA
2018/07/20 23:57:30	NA
2018/07/20 23:58:45	NA
2018/07/21 00:00:00	4
2018/07/21 00:01:15	4
2018/07/21 00:02:30	4
2018/07/21 00:03:45	4
2018/07/21 00:05:00	4
2018/07/21 00:06:15	104.5
2018/07/21 00:07:30	239.5
2018/07/21 00:08:45	359
2018/07/21 00:10:00	419
2018/07/21 00:11:15	419
2018/07/21 00:12:30	419
2018/07/21 00:13:45	419
2018/07/21 00:15:00	239.5
2018/07/21 00:16:15	104.5
2018/07/21 00:17:30	4
2018/07/21 00:18:45	4
2018/07/21 00:20:00	4
2018/07/21 00:21:15	11
2018/07/21 00:22:30	18.5
2018/07/21 00:23:45	4
2018/07/21 00:25:00	4
2018/07/21 00:26:15	4
2018/07/21 00:27:30	4
2018/07/21 00:28:45	4
2018/07/21 00:30:00	4
2018/07/21 00:31:15	11
2018/07/21 00:32:30	4
2018/07/21 00:33:45	4
2018/07/21 00:35:00	4
2018/07/21 00:36:15	11
2018/07/21 00:37:30	11
2018/07/21 00:38:45	11
2018/07/21 00:40:00	11
2018/07/21 00:41:15	4
2018/07/21 00:42:30	4
2018/07/21 00:43:45	4
2018/07/21 00:45:00	4
2018/07/21 00:46:15	4
2018/07/21 00:47:30	4
2018/07/21 00:48:45	4
2018/07/21 00:50:00	4
2018/07/21 00:51:15	11
2018/07/21 00:52:30	4
2018/07/21 00:53:45	37.5
2018/07/21 00:55:00	194.5
2018/07/21 00:56:15	359
2018/07/21 00:57:30	419
2018/07/21 00:58:45	419
2018/07/21 01:00:00	426.5
2018/07/21 01:01:15	426.5
2018/07/21 01:02:30	304
2018/07/21 01:03:45	137
2018/07/21 01:05:00	26.5
2018/07/21 01:06:15	4
2018/07/21 01:07:30	4
2018/07/21 01:08:45	4
2018/07/21 01:10:00	4
2018/07/21 01:11:15	4
2018/07/21 01:12:30	26.5
2018/07/21 01:13:45	11.5
2018/07/21 01:15:00	4
2018/07/21 01:16:15	19
2018/07/21 01:17:30	11.5
2018/07/21 01:18:45	11.5
2018/07/21 01:20:00	4
2018/07/21 01:21:15	19
2018/07/21 01:22:30	4
2018/07/21 01:23:45	4
2018/07/21 01:25:00	11.5
2018/07/21 01:26:15	4
2018/07/21 01:27:30	4
2018/07/21 01:28:45	4
2018/07/21 01:30:00	4
2018/07/21 01:31:15	83.5
2018/07/21 01:32:30	243
2018/07/21 01:33:45	426.5
2018/07/21 01:35:00	426.5
2018/07/21 01:36:15	426.5
2018/07/21 01:37:30	426.5
2018/07/21 01:38:45	365
2018/07/21 01:40:00	243
2018/07/21 01:41:15	83.5
2018/07/21 01:42:30	4
2018/07/21 01:43:45	4
2018/07/21 01:45:00	4
2018/07/21 01:46:15	4
2018/07/21 01:47:30	4
2018/07/21 01:48:45	4
2018/07/21 01:50:00	4
2018/07/21 01:51:15	4
2018/07/21 01:52:30	19
2018/07/21 01:53:45	19
2018/07/21 01:55:00	4
2018/07/21 01:56:15	4
2018/07/21 01:57:30	4
2018/07/21 01:58:45	19
2018/07/21 02:00:00	52
2018/07/21 02:01:15	26
2018/07/21 02:02:30	11
2018/07/21 02:03:45	4
2018/07/21 02:05:00	4
2018/07/21 02:06:15	4
2018/07/21 02:07:30	4
2018/07/21 02:08:45	4
2018/07/21 02:10:00	11
2018/07/21 02:11:15	134.5
2018/07/21 02:12:30	299
2018/07/21 02:13:45	419
2018/07/21 02:15:00	419
2018/07/21 02:16:15	419
2018/07/21 02:17:30	419
2018/07/21 02:18:45	239.5
2018/07/21 02:20:00	104.5
2018/07/21 02:21:15	4
2018/07/21 02:22:30	4
2018/07/21 02:23:45	4
2018/07/21 02:25:00	4
2018/07/21 02:26:15	4
2018/07/21 02:27:30	4
2018/07/21 02:28:45	4
2018/07/21 02:30:00	4
2018/07/21 02:31:15	11
2018/07/21 02:32:30	18.5
2018/07/21 02:33:45	18.5
2018/07/21 02:35:00	11
2018/07/21 02:36:15	18.5
2018/07/21 02:37:30	4
2018/07/21 02:38:45	4
2018/07/21 02:40:00	18.5
2018/07/21 02:41:15	26
2018/07/21 02:42:30	26
2018/07/21 02:43:45	18.5
2018/07/21 02:45:00	4
2018/07/21 02:46:15	4
2018/07/21 02:47:30	4
2018/07/21 02:48:45	4
2018/07/21 02:50:00	18.5
2018/07/21 02:51:15	26
2018/07/21 02:52:30	26
2018/07/21 02:53:45	26
2018/07/21 02:55:00	18.5
2018/07/21 02:56:15	4
2018/07/21 02:57:30	18.5
2018/07/21 02:58:45	4
2018/07/21 03:00:00	11.5
2018/07/21 03:01:15	4
2018/07/21 03:02:30	11.5
2018/07/21 03:03:45	19
2018/07/21 03:05:00	19
2018/07/21 03:06:15	11.5
2018/07/21 03:07:30	11.5
2018/07/21 03:08:45	4
2018/07/21 03:10:00	4
2018/07/21 03:11:15	4
2018/07/21 03:12:30	4
2018/07/21 03:13:45	4
2018/07/21 03:15:00	4
2018/07/21 03:16:15	4
2018/07/21 03:17:30	4
2018/07/21 03:18:45	4
2018/07/21 03:20:00	4
2018/07/21 03:21:15	11.5
2018/07/21 03:22:30	19
2018/07/21 03:23:45	19
2018/07/21 03:25:00	11.5
2018/07/21 03:26:15	11.5
2018/07/21 03:27:30	4
2018/07/21 03:28:45	4
2018/07/21 03:30:00	11.5
2018/07/21 03:31:15	19
2018/07/21 03:32:30	4
2018/07/21 03:33:45	4
2018/07/21 03:35:00	4
2018/07/21 03:36:15	4
2018/07/21 03:37:30	11.5
2018/07/21 03:38:45	19
2018/07/21 03:40:00	19
2018/07/21 03:41:15	4
2018/07/21 03:42:30	4
2018/07/21 03:43:45	4
2018/07/21 03:45:00	4
2018/07/21 03:46:15	38.5
2018/07/21 03:47:30	170
2018/07/21 03:48:45	371
2018/07/21 03:50:00	433
2018/07/21 03:51:15	433
2018/07/21 03:52:30	433
2018/07/21 03:53:45	433
2018/07/21 03:55:00	371
2018/07/21 03:56:15	201
2018/07/21 03:57:30	54
2018/07/21 03:58:45	4
2018/07/21 04:00:00	4
2018/07/21 04:01:15	4
2018/07/21 04:02:30	4
2018/07/21 04:03:45	4
2018/07/21 04:05:00	4
2018/07/21 04:06:15	4
2018/07/21 04:07:30	4
2018/07/21 04:08:45	139
2018/07/21 04:10:00	247.5
2018/07/21 04:11:15	433
2018/07/21 04:12:30	433
2018/07/21 04:13:45	433
2018/07/21 04:15:00	433
2018/07/21 04:16:15	433
2018/07/21 04:17:30	309
2018/07/21 04:18:45	170
2018/07/21 04:20:00	54
2018/07/21 04:21:15	4
2018/07/21 04:22:30	4
2018/07/21 04:23:45	4
2018/07/21 04:25:00	4
2018/07/21 04:26:15	11.5
2018/07/21 04:27:30	4
2018/07/21 04:28:45	4
2018/07/21 04:30:00	4
2018/07/21 04:31:15	4
2018/07/21 04:32:30	4
2018/07/21 04:33:45	11.5
2018/07/21 04:35:00	4
2018/07/21 04:36:15	4
2018/07/21 04:37:30	4
2018/07/21 04:38:45	4
2018/07/21 04:40:00	38.5
2018/07/21 04:41:15	170
2018/07/21 04:42:30	309
2018/07/21 04:43:45	433
2018/07/21 04:45:00	433
2018/07/21 04:46:15	433
2018/07/21 04:47:30	433
2018/07/21 04:48:45	433
2018/07/21 04:50:00	247.5
2018/07/21 04:51:15	139
2018/07/21 04:52:30	19
2018/07/21 04:53:45	4
2018/07/21 04:55:00	4
2018/07/21 04:56:15	4
2018/07/21 04:57:30	4
2018/07/21 04:58:45	4
2018/07/21 05:00:00	4
2018/07/21 05:01:15	4
2018/07/21 05:02:30	108
2018/07/21 05:03:45	247.5
2018/07/21 05:05:00	433
2018/07/21 05:06:15	433
2018/07/21 05:07:30	433
2018/07/21 05:08:45	433
2018/07/21 05:10:00	309
2018/07/21 05:11:15	201
2018/07/21 05:12:30	54
2018/07/21 05:13:45	4
2018/07/21 05:15:00	4
2018/07/21 05:16:15	4
2018/07/21 05:17:30	4
2018/07/21 05:18:45	4
2018/07/21 05:20:00	4
2018/07/21 05:21:15	4
2018/07/21 05:22:30	4
2018/07/21 05:23:45	11.5
2018/07/21 05:25:00	4
2018/07/21 05:26:15	4
2018/07/21 05:27:30	4
2018/07/21 05:28:45	4
2018/07/21 05:30:00	4
2018/07/21 05:31:15	4
2018/07/21 05:32:30	27
2018/07/21 05:33:45	170
2018/07/21 05:35:00	309
2018/07/21 05:36:15	433
2018/07/21 05:37:30	433
2018/07/21 05:38:45	433
2018/07/21 05:40:00	433
2018/07/21 05:41:15	433
2018/07/21 05:42:30	309
2018/07/21 05:43:45	170
2018/07/21 05:45:00	54
2018/07/21 05:46:15	4
2018/07/21 05:47:30	4
2018/07/21 05:48:45	4
2018/07/21 05:50:00	4
2018/07/21 05:51:15	4
2018/07/21 05:52:30	19
2018/07/21 05:53:45	4
2018/07/21 05:55:00	4
2018/07/21 05:56:15	4
2018/07/21 05:57:30	4
2018/07/21 05:58:45	4
2018/07/21 06:00:00	4
2018/07/21 06:01:15	38.5
2018/07/21 06:02:30	170
2018/07/21 06:03:45	309
2018/07/21 06:05:00	433
2018/07/21 06:06:15	433
2018/07/21 06:07:30	433
2018/07/21 06:08:45	433
2018/07/21 06:10:00	371
2018/07/21 06:11:15	201
2018/07/21 06:12:30	54
2018/07/21 06:13:45	4
2018/07/21 06:15:00	4
2018/07/21 06:16:15	4
2018/07/21 06:17:30	4
2018/07/21 06:18:45	4
2018/07/21 06:20:00	4
2018/07/21 06:21:15	11.5
2018/07/21 06:22:30	4
2018/07/21 06:23:45	4
2018/07/21 06:25:00	11.5
2018/07/21 06:26:15	4
2018/07/21 06:27:30	4
2018/07/21 06:28:45	108
2018/07/21 06:30:00	247.5
2018/07/21 06:31:15	371
2018/07/21 06:32:30	433
2018/07/21 06:33:45	433
2018/07/21 06:35:00	433
2018/07/21 06:36:15	433
2018/07/21 06:37:30	309
2018/07/21 06:38:45	201
2018/07/21 06:40:00	54
2018/07/21 06:41:15	4
2018/07/21 06:42:30	4
2018/07/21 06:43:45	4
2018/07/21 06:45:00	4
2018/07/21 06:46:15	4
2018/07/21 06:47:30	4
2018/07/21 06:48:45	11.5
2018/07/21 06:50:00	4
2018/07/21 06:51:15	4
2018/07/21 06:52:30	4
2018/07/21 06:53:45	27
2018/07/21 06:55:00	170
2018/07/21 06:56:15	309
2018/07/21 06:57:30	433
2018/07/21 06:58:45	433
2018/07/21 07:00:00	441.5
2018/07/21 07:01:15	441.5
2018/07/21 07:02:30	441.5
2018/07/21 07:03:45	252
2018/07/21 07:05:00	142
2018/07/21 07:06:15	19.5
2018/07/21 07:07:30	4
2018/07/21 07:08:45	4
2018/07/21 07:10:00	4
2018/07/21 07:11:15	4
2018/07/21 07:12:30	4
2018/07/21 07:13:45	19.5
2018/07/21 07:15:00	27.5
2018/07/21 07:16:15	19.5
2018/07/21 07:17:30	4
2018/07/21 07:18:45	4
2018/07/21 07:20:00	4
2018/07/21 07:21:15	19.5
2018/07/21 07:22:30	19.5
2018/07/21 07:23:45	4
2018/07/21 07:25:00	4
2018/07/21 07:26:15	4
2018/07/21 07:27:30	4
2018/07/21 07:28:45	4
2018/07/21 07:30:00	11.5
2018/07/21 07:31:15	11.5
2018/07/21 07:32:30	19.5
2018/07/21 07:33:45	11.5
2018/07/21 07:35:00	4
2018/07/21 07:36:15	11.5
2018/07/21 07:37:30	39.5
2018/07/21 07:38:45	39.5
2018/07/21 07:40:00	19.5
2018/07/21 07:41:15	4
2018/07/21 07:42:30	4
2018/07/21 07:43:45	4
2018/07/21 07:45:00	55
2018/07/21 07:46:15	205
2018/07/21 07:47:30	378
2018/07/21 07:48:45	441.5
2018/07/21 07:50:00	441.5
2018/07/21 07:51:15	378
2018/07/21 07:52:30	252
2018/07/21 07:53:45	142
2018/07/21 07:55:00	19.5
2018/07/21 07:56:15	4
2018/07/21 07:57:30	4
2018/07/21 07:58:45	4
2018/07/21 08:00:00	11.5
2018/07/21 08:01:15	27.5
2018/07/21 08:02:30	39.5
2018/07/21 08:03:45	39.5
2018/07/21 08:05:00	27.5
2018/07/21 08:06:15	27.5
2018/07/21 08:07:30	4
2018/07/21 08:08:45	4
2018/07/21 08:10:00	4
2018/07/21 08:11:15	4
2018/07/21 08:12:30	4
2018/07/21 08:13:45	19.5
2018/07/21 08:15:00	4
2018/07/21 08:16:15	4
2018/07/21 08:17:30	4
2018/07/21 08:18:45	4
2018/07/21 08:20:00	110.5
2018/07/21 08:21:15	252
2018/07/21 08:22:30	441.5
2018/07/21 08:23:45	441.5
2018/07/21 08:25:00	441.5
2018/07/21 08:26:15	378
2018/07/21 08:27:30	252
2018/07/21 08:28:45	110.5
2018/07/21 08:30:00	4
2018/07/21 08:31:15	4
2018/07/21 08:32:30	4
2018/07/21 08:33:45	4
2018/07/21 08:35:00	4
2018/07/21 08:36:15	4
2018/07/21 08:37:30	4
2018/07/21 08:38:45	4
2018/07/21 08:40:00	11.5
2018/07/21 08:41:15	142
2018/07/21 08:42:30	315
2018/07/21 08:43:45	441.5
2018/07/21 08:45:00	441.5
2018/07/21 08:46:15	441.5
2018/07/21 08:47:30	378
2018/07/21 08:48:45	252
2018/07/21 08:50:00	142
2018/07/21 08:51:15	27.5
2018/07/21 08:52:30	4
2018/07/21 08:53:45	11.5
2018/07/21 08:55:00	4
2018/07/21 08:56:15	4
2018/07/21 08:57:30	4
2018/07/21 08:58:45	4
2018/07/21 09:00:00	108
2018/07/21 09:01:15	247.5
2018/07/21 09:02:30	371
2018/07/21 09:03:45	433
2018/07/21 09:05:00	433
2018/07/21 09:06:15	309
2018/07/21 09:07:30	170
2018/07/21 09:08:45	38.5
2018/07/21 09:10:00	4
2018/07/21 09:11:15	4
2018/07/21 09:12:30	19
2018/07/21 09:13:45	27
2018/07/21 09:15:00	27
2018/07/21 09:16:15	19
2018/07/21 09:17:30	4
2018/07/21 09:18:45	4
2018/07/21 09:20:00	4
2018/07/21 09:21:15	19
2018/07/21 09:22:30	27
2018/07/21 09:23:45	27
2018/07/21 09:25:00	4
2018/07/21 09:26:15	4
2018/07/21 09:27:30	11.5
2018/07/21 09:28:45	19
2018/07/21 09:30:00	27
2018/07/21 09:31:15	27
2018/07/21 09:32:30	27
2018/07/21 09:33:45	19
2018/07/21 09:35:00	4
2018/07/21 09:36:15	4
2018/07/21 09:37:30	4
2018/07/21 09:38:45	4
2018/07/21 09:40:00	19
2018/07/21 09:41:15	11.5
2018/07/21 09:42:30	19
2018/07/21 09:43:45	27
2018/07/21 09:45:00	27
2018/07/21 09:46:15	19
2018/07/21 09:47:30	4
2018/07/21 09:48:45	4
2018/07/21 09:50:00	11.5
2018/07/21 09:51:15	4
2018/07/21 09:52:30	4
2018/07/21 09:53:45	4
2018/07/21 09:55:00	19
2018/07/21 09:56:15	27
2018/07/21 09:57:30	27
2018/07/21 09:58:45	4
2018/07/21 10:00:00	4
2018/07/21 10:01:15	4
2018/07/21 10:02:30	4
2018/07/21 10:03:45	4
2018/07/21 10:05:00	4
2018/07/21 10:06:15	12
2018/07/21 10:07:30	4
2018/07/21 10:08:45	40
2018/07/21 10:10:00	208
2018/07/21 10:11:15	384
2018/07/21 10:12:30	448.5
2018/07/21 10:13:45	448.5
2018/07/21 10:15:00	448.5
2018/07/21 10:16:15	320
2018/07/21 10:17:30	176
2018/07/21 10:18:45	56
2018/07/21 10:20:00	4
2018/07/21 10:21:15	4
2018/07/21 10:22:30	4
2018/07/21 10:23:45	4
2018/07/21 10:25:00	4
2018/07/21 10:26:15	4
2018/07/21 10:27:30	12
2018/07/21 10:28:45	144
2018/07/21 10:30:00	320
2018/07/21 10:31:15	448.5
2018/07/21 10:32:30	448.5
2018/07/21 10:33:45	448.5
2018/07/21 10:35:00	384
2018/07/21 10:36:15	208
2018/07/21 10:37:30	72
2018/07/21 10:38:45	4
2018/07/21 10:40:00	4
2018/07/21 10:41:15	4
2018/07/21 10:42:30	4
2018/07/21 10:43:45	4
2018/07/21 10:45:00	4
2018/07/21 10:46:15	4
2018/07/21 10:47:30	112
2018/07/21 10:48:45	256
2018/07/21 10:50:00	448.5
2018/07/21 10:51:15	448.5
2018/07/21 10:52:30	448.5
2018/07/21 10:53:45	448.5
2018/07/21 10:55:00	384
2018/07/21 10:56:15	256
2018/07/21 10:57:30	112
2018/07/21 10:58:45	4
2018/07/21 11:00:00	4
2018/07/21 11:01:15	4
2018/07/21 11:02:30	4
2018/07/21 11:03:45	4
2018/07/21 11:05:00	4
2018/07/21 11:06:15	4
2018/07/21 11:07:30	4
2018/07/21 11:08:45	4
2018/07/21 11:10:00	4
2018/07/21 11:11:15	4
2018/07/21 11:12:30	4
2018/07/21 11:13:45	112
2018/07/21 11:15:00	256
2018/07/21 11:16:15	384
2018/07/21 11:17:30	448.5
2018/07/21 11:18:45	448.5
2018/07/21 11:20:00	448.5
2018/07/21 11:21:15	320
2018/07/21 11:22:30	208
2018/07/21 11:23:45	56
2018/07/21 11:25:00	4
2018/07/21 11:26:15	4
2018/07/21 11:27:30	4
2018/07/21 11:28:45	4
2018/07/21 11:30:00	4
2018/07/21 11:31:15	12
2018/07/21 11:32:30	4
2018/07/21 11:33:45	4
2018/07/21 11:35:00	56
2018/07/21 11:36:15	176
2018/07/21 11:37:30	320
2018/07/21 11:38:45	448.5
2018/07/21 11:40:00	448.5
2018/07/21 11:41:15	448.5
2018/07/21 11:42:30	384
2018/07/21 11:43:45	208
2018/07/21 11:45:00	88
2018/07/21 11:46:15	4
2018/07/21 11:47:30	4
2018/07/21 11:48:45	4
2018/07/21 11:50:00	4
2018/07/21 11:51:15	4
2018/07/21 11:52:30	12
2018/07/21 11:53:45	144
2018/07/21 11:55:00	320
2018/07/21 11:56:15	448.5
2018/07/21 11:57:30	448.5
2018/07/21 11:58:45	448.5
2018/07/21 12:00:00	384
2018/07/21 12:01:15	256
2018/07/21 12:02:30	144
2018/07/21 12:03:45	4
2018/07/21 12:05:00	4
2018/07/21 12:06:15	4
2018/07/21 12:07:30	4
2018/07/21 12:08:45	12
2018/07/21 12:10:00	12
2018/07/21 12:11:15	4
2018/07/21 12:12:30	4
2018/07/21 12:13:45	4
2018/07/21 12:15:00	4
2018/07/21 12:16:15	4
2018/07/21 12:17:30	4
2018/07/21 12:18:45	4
2018/07/21 12:20:00	4
2018/07/21 12:21:15	4
2018/07/21 12:22:30	88
2018/07/21 12:23:45	256
2018/07/21 12:25:00	384
2018/07/21 12:26:15	448.5
2018/07/21 12:27:30	448.5
2018/07/21 12:28:45	448.5
2018/07/21 12:30:00	320
2018/07/21 12:31:15	208
2018/07/21 12:32:30	88
2018/07/21 12:33:45	4
2018/07/21 12:35:00	4
2018/07/21 12:36:15	4
2018/07/21 12:37:30	4
2018/07/21 12:38:45	4
2018/07/21 12:40:00	4
2018/07/21 12:41:15	4
2018/07/21 12:42:30	4
2018/07/21 12:43:45	4
2018/07/21 12:45:00	56
2018/07/21 12:46:15	176
2018/07/21 12:47:30	320
2018/07/21 12:48:45	448.5
2018/07/21 12:50:00	448.5
2018/07/21 12:51:15	448.5
2018/07/21 12:52:30	384
2018/07/21 12:53:45	256
2018/07/21 12:55:00	112
2018/07/21 12:56:15	4
2018/07/21 12:57:30	4
2018/07/21 12:58:45	4
2018/07/21 13:00:00	4
2018/07/21 13:01:15	4
2018/07/21 13:02:30	12
2018/07/21 13:03:45	4
2018/07/21 13:05:00	4
2018/07/21 13:06:15	20
2018/07/21 13:07:30	20
2018/07/21 13:08:45	4
2018/07/21 13:10:00	4
2018/07/21 13:11:15	4
2018/07/21 13:12:30	4
2018/07/21 13:13:45	4
2018/07/21 13:15:00	56
2018/07/21 13:16:15	208
2018/07/21 13:17:30	320
2018/07/21 13:18:45	448.5
2018/07/21 13:20:00	448.5
2018/07/21 13:21:15	448.5
2018/07/21 13:22:30	384
2018/07/21 13:23:45	256
2018/07/21 13:25:00	112
2018/07/21 13:26:15	4
2018/07/21 13:27:30	4
2018/07/21 13:28:45	4
2018/07/21 13:30:00	4
2018/07/21 13:31:15	4
2018/07/21 13:32:30	4
2018/07/21 13:33:45	4
2018/07/21 13:35:00	12
2018/07/21 13:36:15	4
2018/07/21 13:37:30	4
2018/07/21 13:38:45	4
2018/07/21 13:40:00	28
2018/07/21 13:41:15	176
2018/07/21 13:42:30	320
2018/07/21 13:43:45	448.5
2018/07/21 13:45:00	448.5
2018/07/21 13:46:15	448.5
2018/07/21 13:47:30	448.5
2018/07/21 13:48:45	256
2018/07/21 13:50:00	144
2018/07/21 13:51:15	28
2018/07/21 13:52:30	4
2018/07/21 13:53:45	4
2018/07/21 13:55:00	4
2018/07/21 13:56:15	4
2018/07/21 13:57:30	4
2018/07/21 13:58:45	4
2018/07/21 14:00:00	4
2018/07/21 14:01:15	114
2018/07/21 14:02:30	260
2018/07/21 14:03:45	455.5
2018/07/21 14:05:00	455.5
2018/07/21 14:06:15	455.5
2018/07/21 14:07:30	455.5
2018/07/21 14:08:45	325
2018/07/21 14:10:00	211.5
2018/07/21 14:11:15	73
2018/07/21 14:12:30	4
2018/07/21 14:13:45	4
2018/07/21 14:15:00	4
2018/07/21 14:16:15	4
2018/07/21 14:17:30	4
2018/07/21 14:18:45	4
2018/07/21 14:20:00	4
2018/07/21 14:21:15	4
2018/07/21 14:22:30	4
2018/07/21 14:23:45	4
2018/07/21 14:25:00	4
2018/07/21 14:26:15	4
2018/07/21 14:27:30	4
2018/07/21 14:28:45	89.5
2018/07/21 14:30:00	260
2018/07/21 14:31:15	390
2018/07/21 14:32:30	455.5
2018/07/21 14:33:45	455.5
2018/07/21 14:35:00	455.5
2018/07/21 14:36:15	455.5
2018/07/21 14:37:30	325
2018/07/21 14:38:45	179
2018/07/21 14:40:00	57
2018/07/21 14:41:15	4
2018/07/21 14:42:30	4
2018/07/21 14:43:45	4
2018/07/21 14:45:00	4
2018/07/21 14:46:15	4
2018/07/21 14:47:30	20.5
2018/07/21 14:48:45	20.5
2018/07/21 14:50:00	4
2018/07/21 14:51:15	4
2018/07/21 14:52:30	4
2018/07/21 14:53:45	4
2018/07/21 14:55:00	4
2018/07/21 14:56:15	4
2018/07/21 14:57:30	12
2018/07/21 14:58:45	4
2018/07/21 15:00:00	4
2018/07/21 15:01:15	4
2018/07/21 15:02:30	12
2018/07/21 15:03:45	12
2018/07/21 15:05:00	4
2018/07/21 15:06:15	4
2018/07/21 15:07:30	4
2018/07/21 15:08:45	4
2018/07/21 15:10:00	56
2018/07/21 15:11:15	208
2018/07/21 15:12:30	384
2018/07/21 15:13:45	448.5
2018/07/21 15:15:00	448.5
2018/07/21 15:16:15	448.5
2018/07/21 15:17:30	384
2018/07/21 15:18:45	256
2018/07/21 15:20:00	112
2018/07/21 15:21:15	4
2018/07/21 15:22:30	4
2018/07/21 15:23:45	4
2018/07/21 15:25:00	12
2018/07/21 15:26:15	4
2018/07/21 15:27:30	4
2018/07/21 15:28:45	4
2018/07/21 15:30:00	4
2018/07/21 15:31:15	4
2018/07/21 15:32:30	4
2018/07/21 15:33:45	4
2018/07/21 15:35:00	12
2018/07/21 15:36:15	4
2018/07/21 15:37:30	12
2018/07/21 15:38:45	4
2018/07/21 15:40:00	4
2018/07/21 15:41:15	112
2018/07/21 15:42:30	256
2018/07/21 15:43:45	448.5
2018/07/21 15:45:00	448.5
2018/07/21 15:46:15	448.5
2018/07/21 15:47:30	384
2018/07/21 15:48:45	256
2018/07/21 15:50:00	112
2018/07/21 15:51:15	4
2018/07/21 15:52:30	4
2018/07/21 15:53:45	4
2018/07/21 15:55:00	4
2018/07/21 15:56:15	4
2018/07/21 15:57:30	4
2018/07/21 15:58:45	4
2018/07/21 16:00:00	110.5
2018/07/21 16:01:15	315
2018/07/21 16:02:30	441.5
2018/07/21 16:03:45	441.5
2018/07/21 16:05:00	441.5
2018/07/21 16:06:15	441.5
2018/07/21 16:07:30	315
2018/07/21 16:08:45	173.5
2018/07/21 16:10:00	27.5
2018/07/21 16:11:15	4
2018/07/21 16:12:30	4
2018/07/21 16:13:45	4
2018/07/21 16:15:00	4
2018/07/21 16:16:15	4
2018/07/21 16:17:30	4
2018/07/21 16:18:45	4
2018/07/21 16:20:00	4
2018/07/21 16:21:15	4
2018/07/21 16:22:30	71
2018/07/21 16:23:45	252
2018/07/21 16:25:00	378
2018/07/21 16:26:15	441.5
2018/07/21 16:27:30	441.5
2018/07/21 16:28:45	441.5
2018/07/21 16:30:00	441.5
2018/07/21 16:31:15	315
2018/07/21 16:32:30	142
2018/07/21 16:33:45	19.5
2018/07/21 16:35:00	4
2018/07/21 16:36:15	4
2018/07/21 16:37:30	4
2018/07/21 16:38:45	4
2018/07/21 16:40:00	4
2018/07/21 16:41:15	4
2018/07/21 16:42:30	4
2018/07/21 16:43:45	4
2018/07/21 16:45:00	4
2018/07/21 16:46:15	71
2018/07/21 16:47:30	252
2018/07/21 16:48:45	378
2018/07/21 16:50:00	441.5
2018/07/21 16:51:15	441.5
2018/07/21 16:52:30	441.5
2018/07/21 16:53:45	441.5
2018/07/21 16:55:00	378
2018/07/21 16:56:15	252
2018/07/21 16:57:30	110.5
2018/07/21 16:58:45	4
2018/07/21 17:00:00	4
2018/07/21 17:01:15	4
2018/07/21 17:02:30	4
2018/07/21 17:03:45	4
2018/07/21 17:05:00	4
2018/07/21 17:06:15	4
2018/07/21 17:07:30	4
2018/07/21 17:08:45	4
2018/07/21 17:10:00	4
2018/07/21 17:11:15	4
2018/07/21 17:12:30	19.5
2018/07/21 17:13:45	173.5
2018/07/21 17:15:00	378
2018/07/21 17:16:15	441.5
2018/07/21 17:17:30	441.5
2018/07/21 17:18:45	441.5
2018/07/21 17:20:00	441.5
2018/07/21 17:21:15	378
2018/07/21 17:22:30	252
2018/07/21 17:23:45	110.5
2018/07/21 17:25:00	4
2018/07/21 17:26:15	4
2018/07/21 17:27:30	4
2018/07/21 17:28:45	4
2018/07/21 17:30:00	4
2018/07/21 17:31:15	4
2018/07/21 17:32:30	4
2018/07/21 17:33:45	4
2018/07/21 17:35:00	86.5
2018/07/21 17:36:15	252
2018/07/21 17:37:30	378
2018/07/21 17:38:45	441.5
2018/07/21 17:40:00	441.5
2018/07/21 17:41:15	441.5
2018/07/21 17:42:30	315
2018/07/21 17:43:45	205
2018/07/21 17:45:00	39.5
2018/07/21 17:46:15	4
2018/07/21 17:47:30	4
2018/07/21 17:48:45	4
2018/07/21 17:50:00	4
2018/07/21 17:51:15	4
2018/07/21 17:52:30	4
2018/07/21 17:53:45	4
2018/07/21 17:55:00	4
2018/07/21 17:56:15	86.5
2018/07/21 17:57:30	252
2018/07/21 17:58:45	378
2018/07/21 18:00:00	441.5
2018/07/21 18:01:15	441.5
2018/07/21 18:02:30	441.5
2018/07/21 18:03:45	378
2018/07/21 18:05:00	252
2018/07/21 18:06:15	110.5
2018/07/21 18:07:30	4
2018/07/21 18:08:45	4
2018/07/21 18:10:00	4
2018/07/21 18:11:15	4
2018/07/21 18:12:30	11.5
2018/07/21 18:13:45	4
2018/07/21 18:15:00	4
2018/07/21 18:16:15	4
2018/07/21 18:17:30	4
2018/07/21 18:18:45	4
2018/07/21 18:20:00	4
2018/07/21 18:21:15	142
2018/07/21 18:22:30	315
2018/07/21 18:23:45	441.5
2018/07/21 18:25:00	441.5
2018/07/21 18:26:15	441.5
2018/07/21 18:27:30	441.5
2018/07/21 18:28:45	252
2018/07/21 18:30:00	142
2018/07/21 18:31:15	4
2018/07/21 18:32:30	4
2018/07/21 18:33:45	4
2018/07/21 18:35:00	4
2018/07/21 18:36:15	4
2018/07/21 18:37:30	4
2018/07/21 18:38:45	4
2018/07/21 18:40:00	4
2018/07/21 18:41:15	110.5
2018/07/21 18:42:30	252
2018/07/21 18:43:45	441.5
2018/07/21 18:45:00	441.5
2018/07/21 18:46:15	441.5
2018/07/21 18:47:30	378
2018/07/21 18:48:45	252
2018/07/21 18:50:00	110.5
2018/07/21 18:51:15	4
2018/07/21 18:52:30	4
2018/07/21 18:53:45	4
2018/07/21 18:55:00	4
2018/07/21 18:56:15	4
2018/07/21 18:57:30	4
2018/07/21 18:58:45	4
2018/07/21 19:00:00	4
2018/07/21 19:01:15	4
2018/07/21 19:02:30	4
2018/07/21 19:03:45	4
2018/07/21 19:05:00	4
2018/07/21 19:06:15	4
2018/07/21 19:07:30	4
2018/07/21 19:08:45	112
2018/07/21 19:10:00	256
2018/07/21 19:11:15	384
2018/07/21 19:12:30	448.5
2018/07/21 19:13:45	448.5
2018/07/21 19:15:00	448.5
2018/07/21 19:16:15	320
2018/07/21 19:17:30	176
2018/07/21 19:18:45	56
2018/07/21 19:20:00	4
2018/07/21 19:21:15	4
2018/07/21 19:22:30	4
2018/07/21 19:23:45	4
2018/07/21 19:25:00	4
2018/07/21 19:26:15	4
2018/07/21 19:27:30	4
2018/07/21 19:28:45	4
2018/07/21 19:30:00	4
2018/07/21 19:31:15	4
2018/07/21 19:32:30	4
2018/07/21 19:33:45	4
2018/07/21 19:35:00	4
2018/07/21 19:36:15	4
2018/07/21 19:37:30	12
2018/07/21 19:38:45	4
2018/07/21 19:40:00	4
2018/07/21 19:41:15	4
2018/07/21 19:42:30	4
2018/07/21 19:43:45	4
2018/07/21 19:45:00	4
2018/07/21 19:46:15	4
2018/07/21 19:47:30	4
2018/07/21 19:48:45	4
2018/07/21 19:50:00	4
2018/07/21 19:51:15	4
2018/07/21 19:52:30	4
2018/07/21 19:53:45	4
2018/07/21 19:55:00	12
2018/07/21 19:56:15	4
2018/07/21 19:57:30	4
2018/07/21 19:58:45	4
2018/07/21 20:00:00	12
2018/07/21 20:01:15	20
2018/07/21 20:02:30	4
2018/07/21 20:03:45	4
2018/07/21 20:05:00	4
2018/07/21 20:06:15	4
2018/07/21 20:07:30	20
2018/07/21 20:08:45	20
2018/07/21 20:10:00	20
2018/07/21 20:11:15	4
2018/07/21 20:12:30	4
2018/07/21 20:13:45	4
2018/07/21 20:15:00	4
2018/07/21 20:16:15	4
2018/07/21 20:17:30	12
2018/07/21 20:18:45	4
2018/07/21 20:20:00	4
2018/07/21 20:21:15	56
2018/07/21 20:22:30	208
2018/07/21 20:23:45	384
2018/07/21 20:25:00	448.5
2018/07/21 20:26:15	448.5
2018/07/21 20:27:30	448.5
2018/07/21 20:28:45	320
2018/07/21 20:30:00	176
2018/07/21 20:31:15	28
2018/07/21 20:32:30	4
2018/07/21 20:33:45	4
2018/07/21 20:35:00	4
2018/07/21 20:36:15	4
2018/07/21 20:37:30	4
2018/07/21 20:38:45	4
2018/07/21 20:40:00	20
2018/07/21 20:41:15	20
2018/07/21 20:42:30	20
2018/07/21 20:43:45	12
2018/07/21 20:45:00	4
2018/07/21 20:46:15	4
2018/07/21 20:47:30	4
2018/07/21 20:48:45	4
2018/07/21 20:50:00	4
2018/07/21 20:51:15	12
2018/07/21 20:52:30	20
2018/07/21 20:53:45	20
2018/07/21 20:55:00	4
2018/07/21 20:56:15	4
2018/07/21 20:57:30	4
2018/07/21 20:58:45	4
2018/07/21 21:00:00	4
2018/07/21 21:01:15	4
2018/07/21 21:02:30	4
2018/07/21 21:03:45	4
2018/07/21 21:05:00	4
2018/07/21 21:06:15	4
2018/07/21 21:07:30	4
2018/07/21 21:08:45	4
2018/07/21 21:10:00	4
2018/07/21 21:11:15	4
2018/07/21 21:12:30	116
2018/07/21 21:13:45	265
2018/07/21 21:15:00	397.5
2018/07/21 21:16:15	463.5
2018/07/21 21:17:30	463.5
2018/07/21 21:18:45	463.5
2018/07/21 21:20:00	397.5
2018/07/21 21:21:15	265
2018/07/21 21:22:30	116
2018/07/21 21:23:45	4
2018/07/21 21:25:00	4
2018/07/21 21:26:15	4
2018/07/21 21:27:30	4
2018/07/21 21:28:45	4
2018/07/21 21:30:00	4
